# Supplementary material for: On the combustion mechanisms of ZrH2 in double-base propellant
Source: Royal Society of Chemistry journal article supplement (doi:10.1039/c7cp02593a), 2017-01-01
Supplement: c7cp02593a1.pdf [file c7cp02593a1.pdf]

## On the combustion mechanisms of $ZrH_2$ in double-base propellant

Yanjing Yang, Fengqi Zhao\*, Zhifeng Yuan, Ying Wang, Ting An, Xueli Chen, Chunlei Xuan,  
Jiankan Zhang

Science and Technology on Combustion and Explosion Laboratory, Xi'an Modern Chemistry  
Research Institute, Xi'an, Shannxi 710065, China.

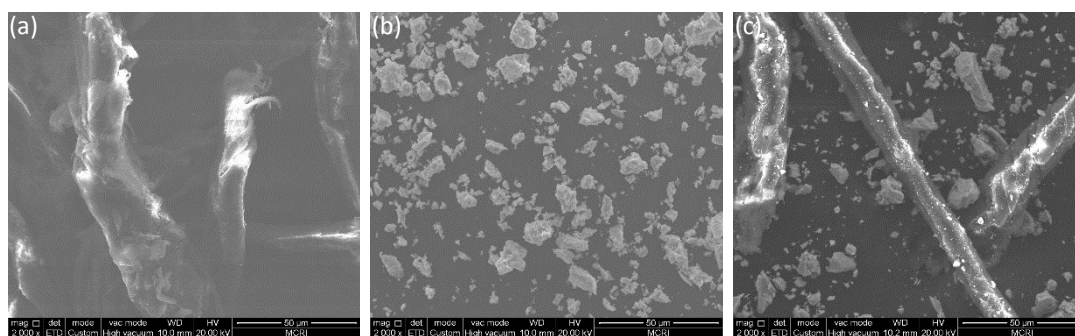

Figure S1. SEM images of the NC/NG composite (a), ZrH(b) and their mixture (c)
